# Supplementary material
Source: Research Square preprint supplement (doi:10.21203/rs.3.rs-9292361/v1)

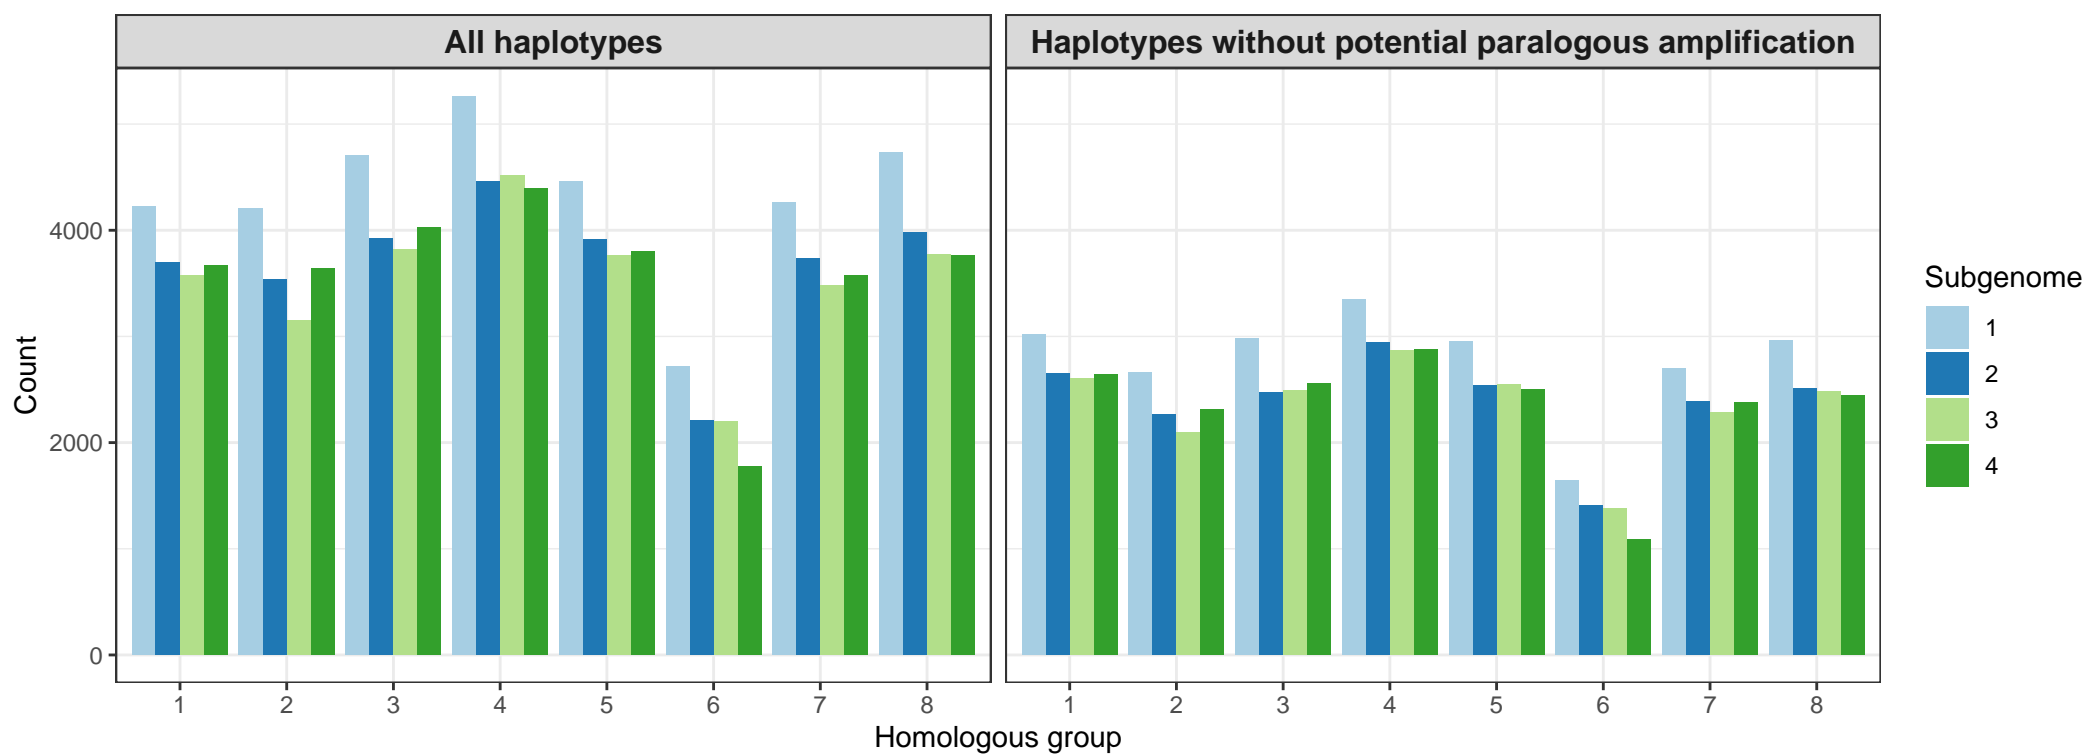

Supplement: Supplementary file 1 [file SuppFig 2. alfalfa_hap_count_each_chr_v50.pdf › SupplementaryMaterials/SuppFig 2. alfalfa_hap_count_each_chr_v50.pdf]

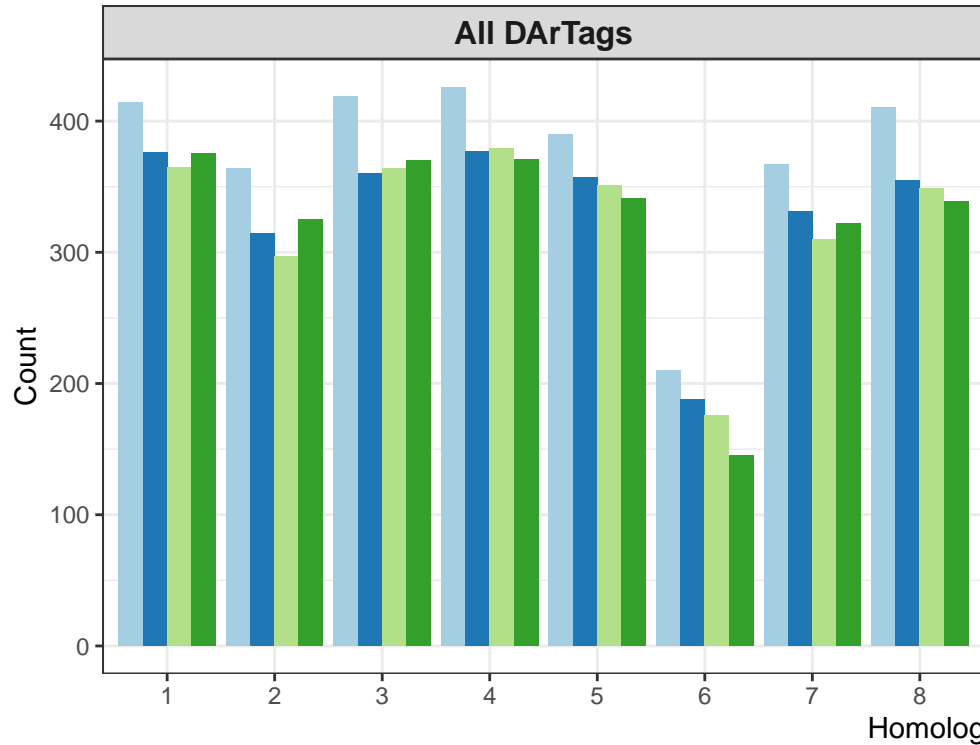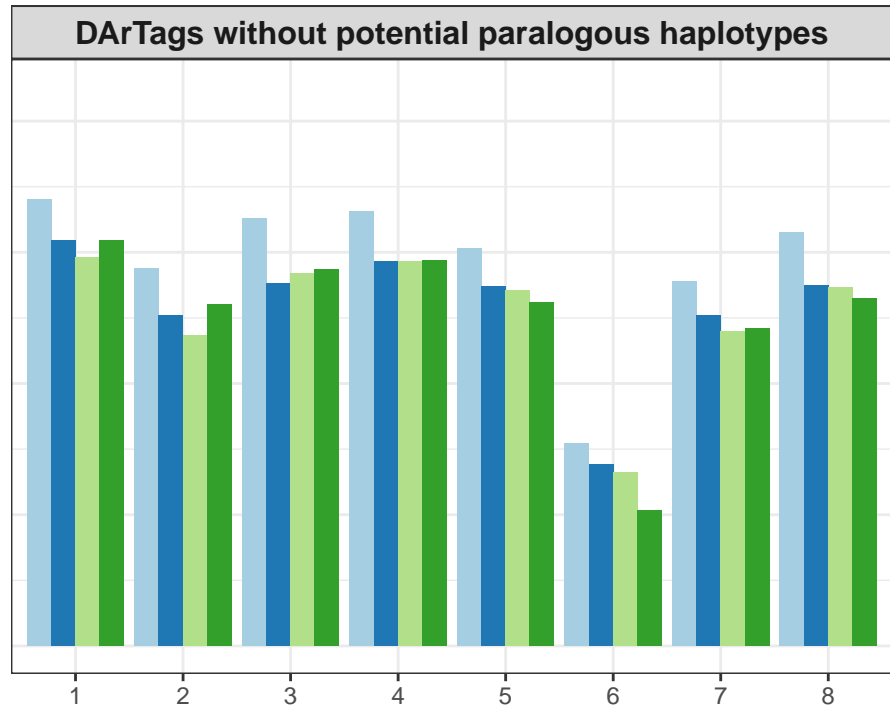

Subgenome

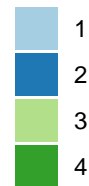

Supplement: Supplementary file 2 [file SuppFig 3. alfalfa_tag_count_each_chr_v50.pdf › SupplementaryMaterials/SuppFig 3. alfalfa_tag_count_each_chr_v50.pdf]

Copy number across subgenomes 1 2 3 4

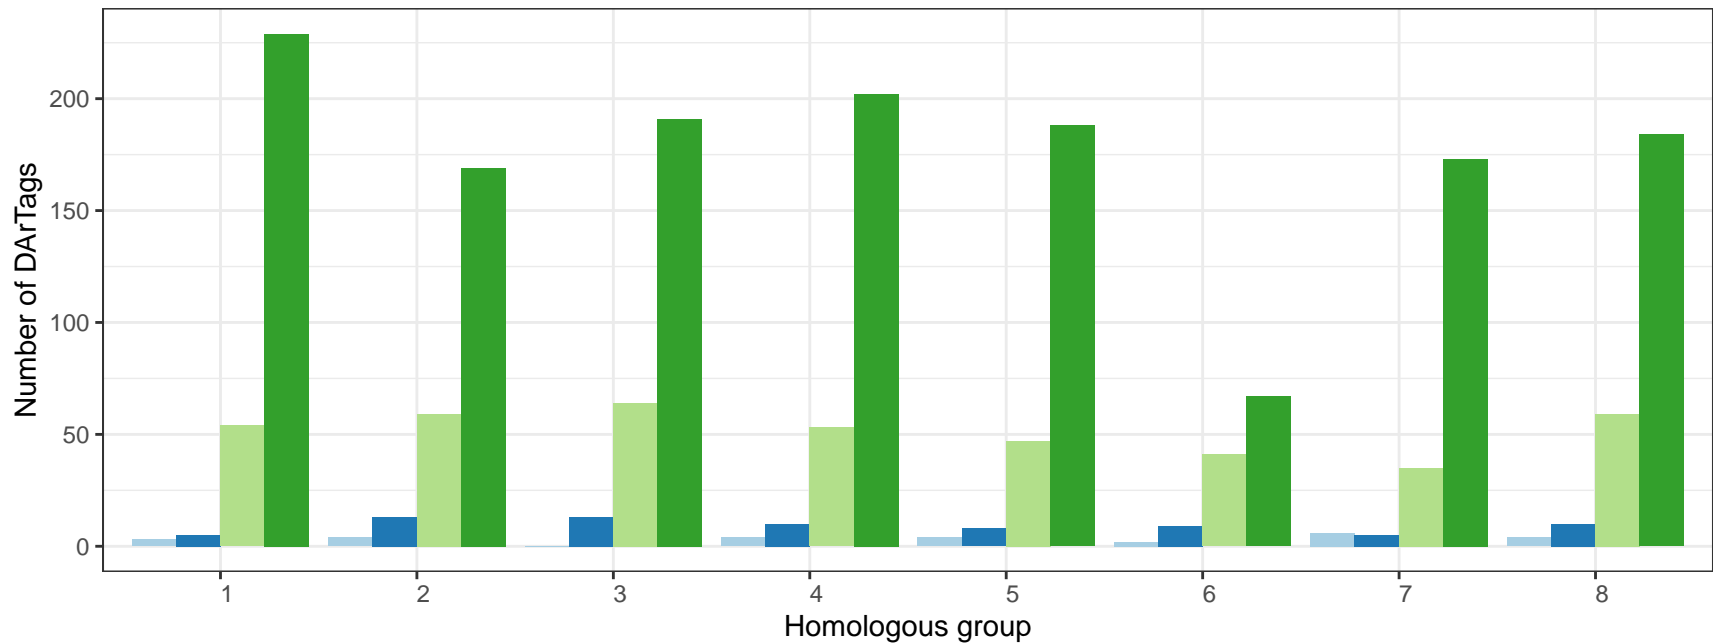

Supplement: Supplementary file 3 [file SuppFig 4. alfalfa_copy_number_each_hm_grp_nonPara_tag_v50.pdf › SupplementaryMaterials/SuppFig 4. alfalfa_copy_number_each_hm_grp_nonPara_tag_v50.pdf]

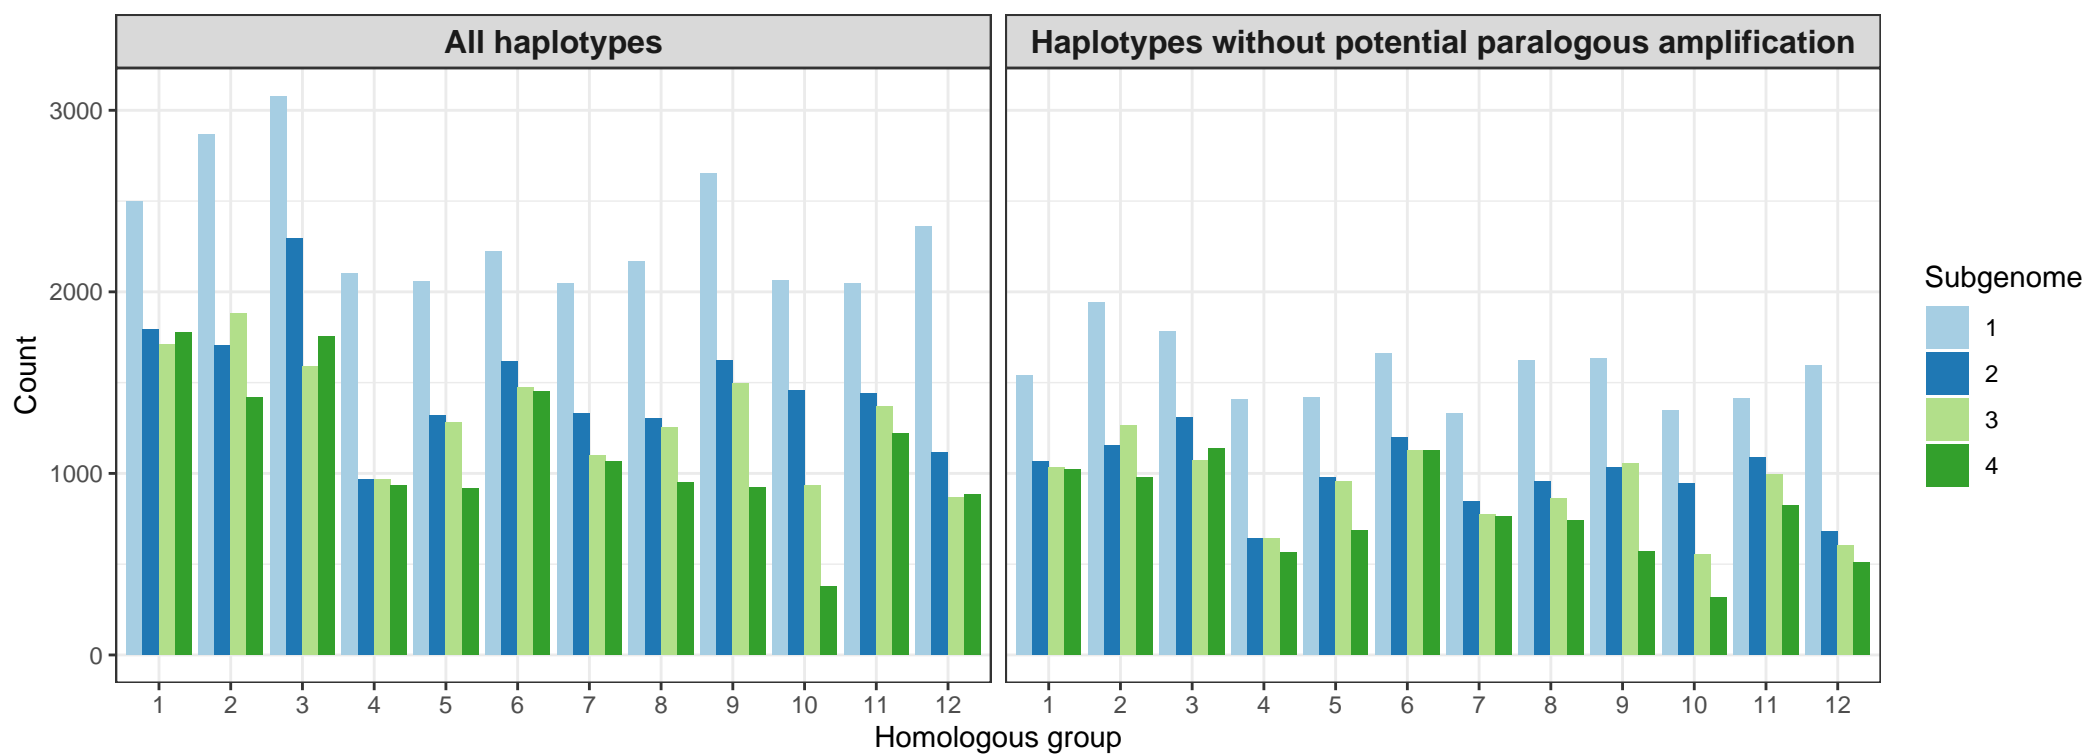

Supplement: Supplementary file 4 [file SuppFig 5. blueberry_hap_count_each_chr_v20.pdf › SupplementaryMaterials/SuppFig 5. blueberry_hap_count_each_chr_v20.pdf]

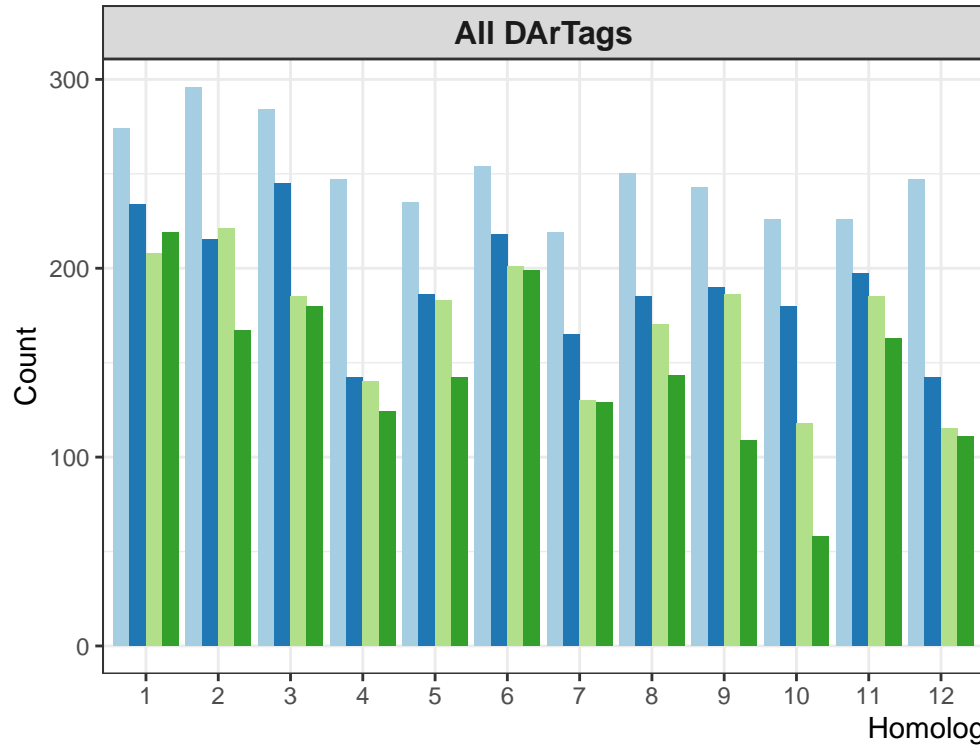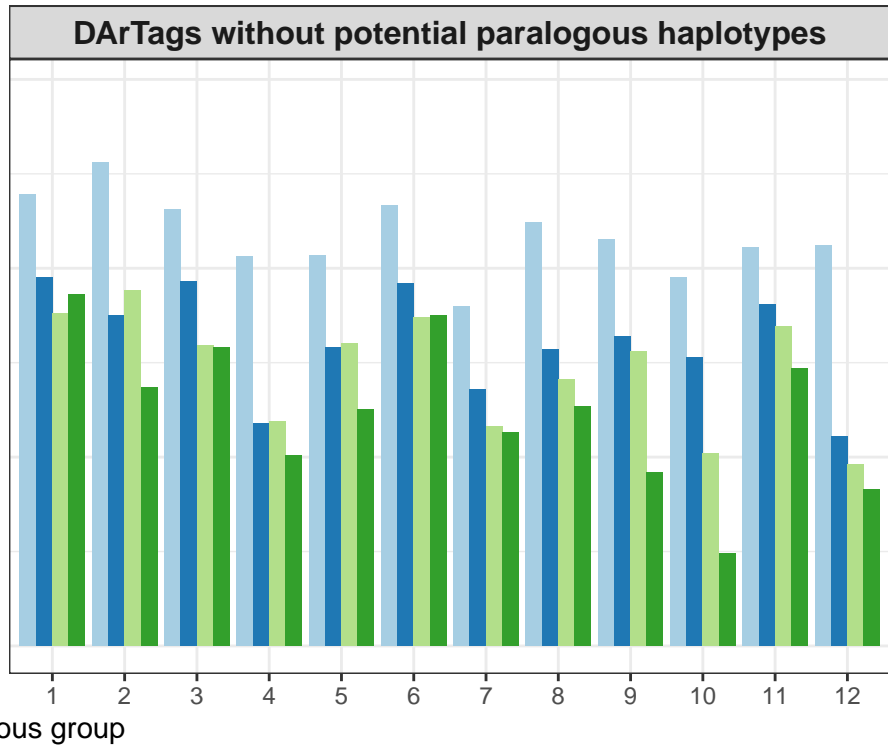

Subgenome

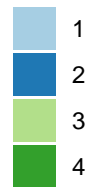

Supplement: Supplementary file 5 [file SuppFig 6. blueberry_tag_count_each_chr_v20.pdf › SupplementaryMaterials/SuppFig 6. blueberry_tag_count_each_chr_v20.pdf]

Copy number across subgenomes 1 2 3 4

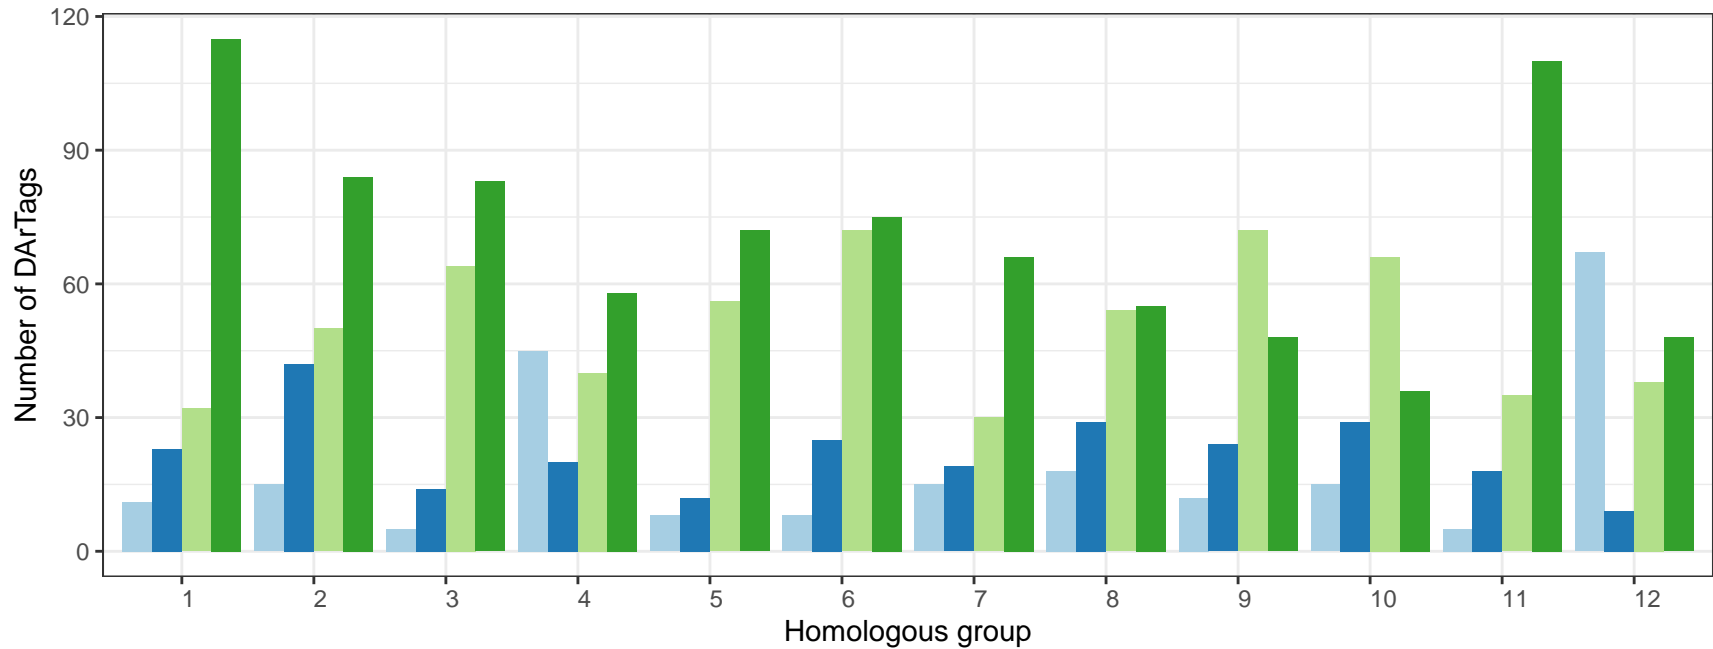

Supplement: Supplementary file 6 [file SuppFig 8. blueberry_copy_number_each_hm_grp_nonPara_tag_v20.pdf › SupplementaryMaterials/SuppFig 8. blueberry_copy_number_each_hm_grp_nonPara_tag_v20.pdf]
